# Supplementary material
Source: PubMed Central journal article supplement (PMC3061812)
Supplement: NIHMS159935-supplement-01.pdf [file NIHMS159935-supplement-01.pdf]

## Supporting information

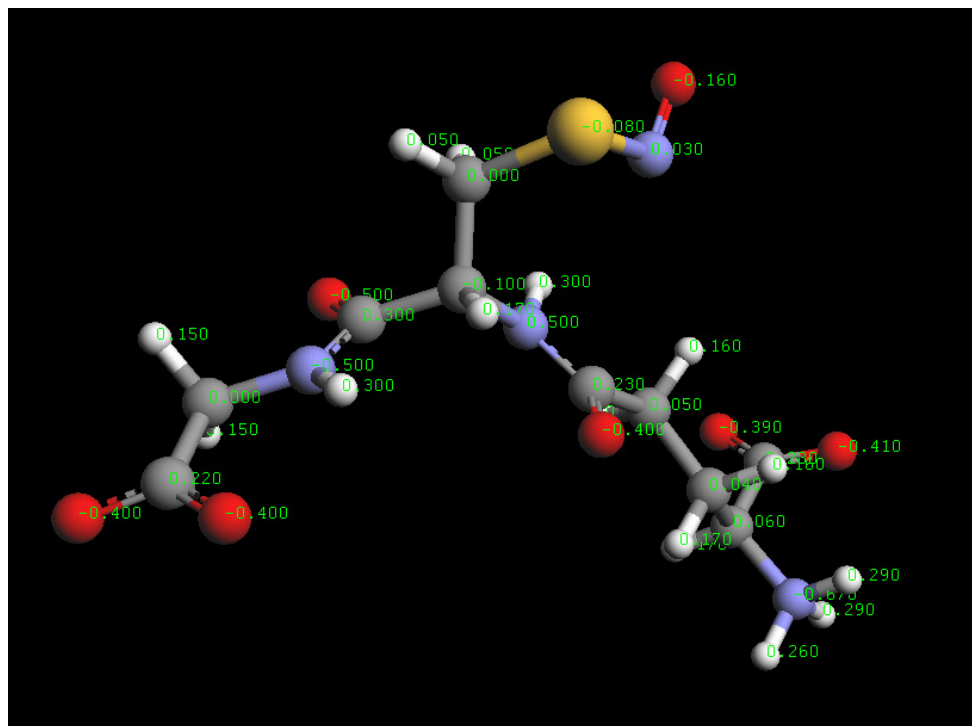

**Figure S1: GSNO charge scheme.** Structure and atomic charge distribution for GSNO employed in the docking calculations.

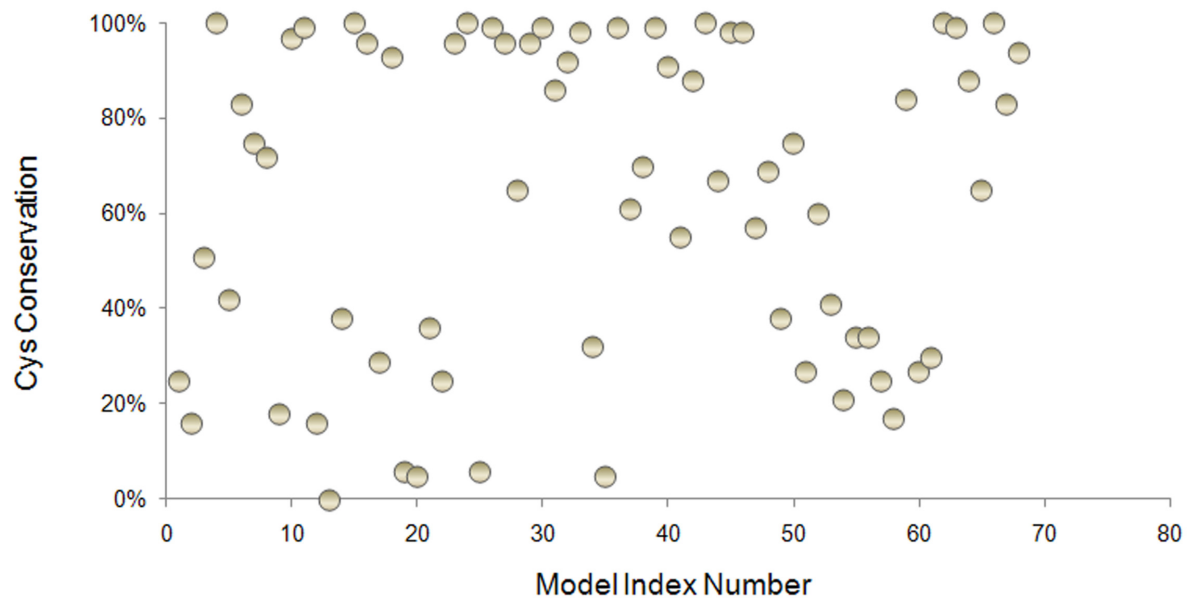

**Figure S2: Cys conservation for each NO-Cys in the dataset.** Proteins are shown in the same order as in the main text, and in the supplementary information, Table S1.

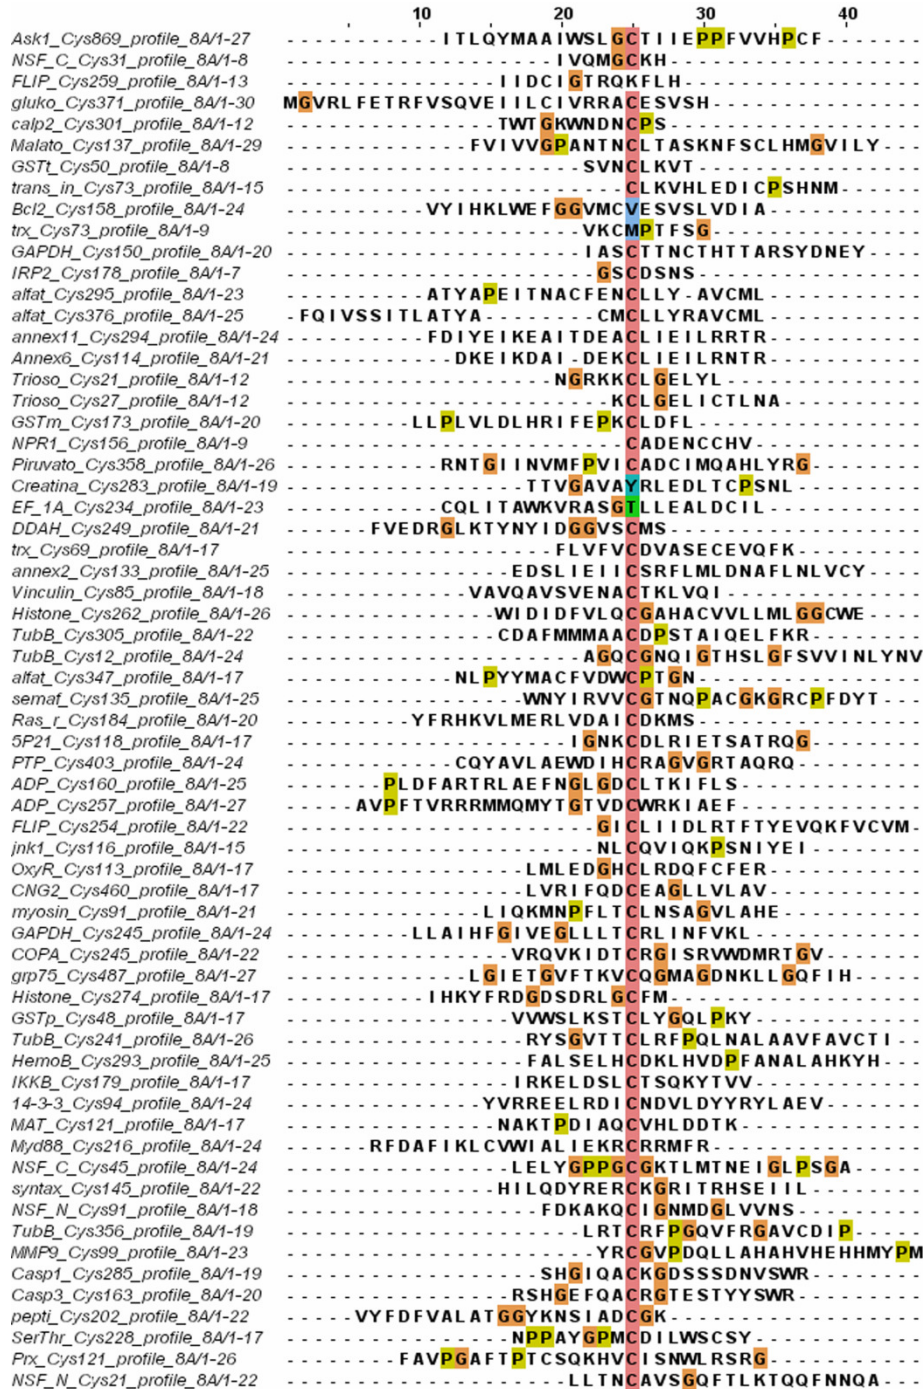

**Figure S3: Structural profile analysis of NO-Cys sites in the dataset.** Overall, no common features were derived from the structural profile analysis.

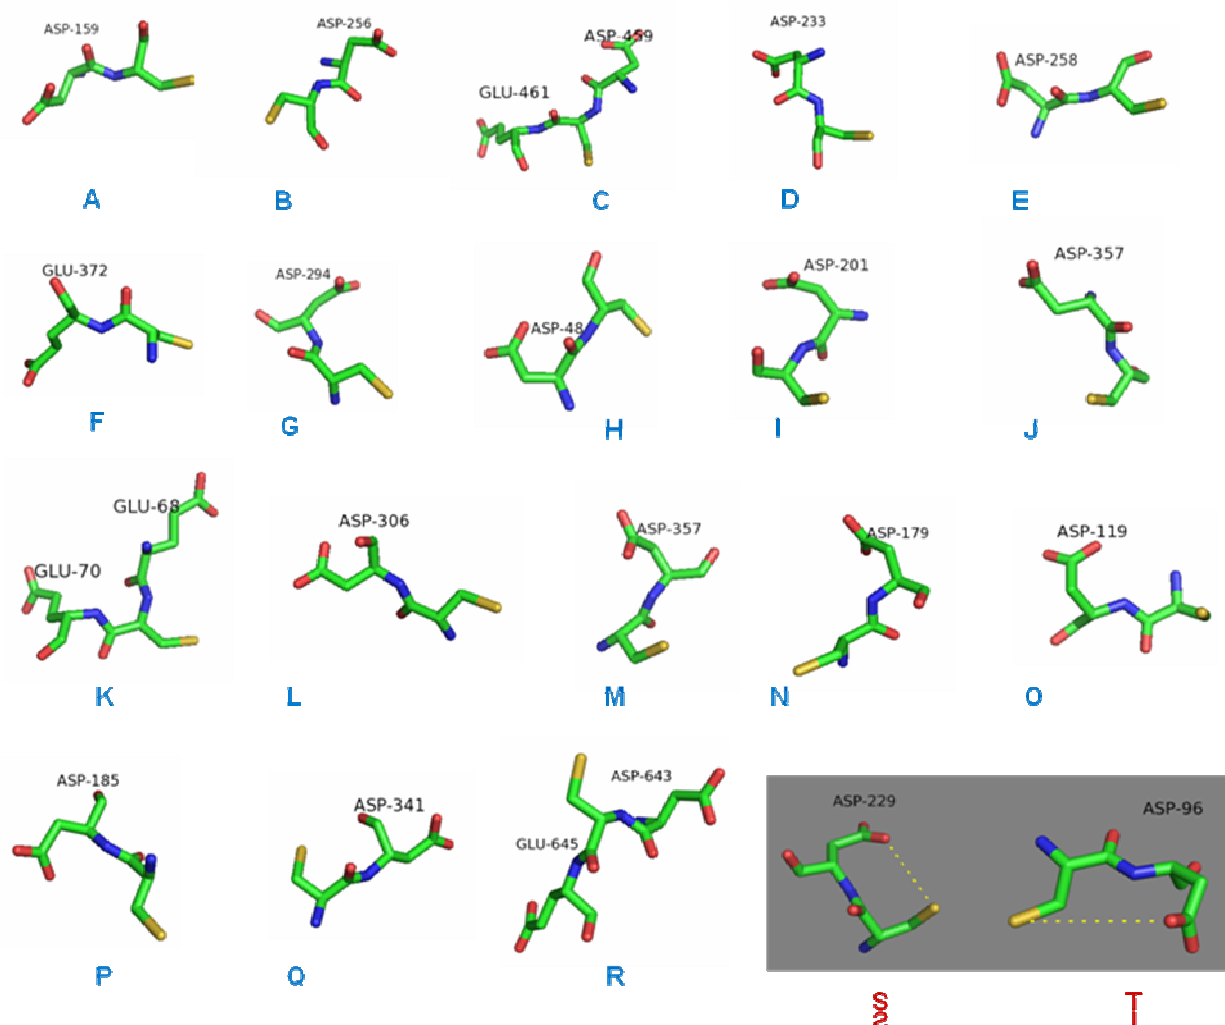

**Figure S4: Relative positioning of negatively charged residues in vicinity of NO-Cys.** All NO-Cys sites in our dataset with an acidic amino acid flanking Cys in the sequence were analyzed for the distance between charged groups and sulfur atoms. NO-Cys groups are indicated with a letter code (in brackets the name of the protein, complete or as abbreviated in main text): A=ADP/ATP translocase (Cys 160), B=ADP/ATP translocase (Cys 257), C= CNG2 (Cys 460), D=EF1A (Cys 234), E=FLIP (Cys 259), F=glukokinase (Cys 372), G=hemoglobin (Cys 293), H=Sodium/potassium-transporting ATPase (Cys 49), I=peptidylprolyl isomerase (Cys 202), J=pyruvate kinase (Cys 356), K=TRX1 (Cys 69), L=tubulin beta (Cys 305), M=tubulin beta (Cys 356), N=IRP2 (Cys 178), O=ras p21 (Cys 118), P= ras-related protein Rab-3B (Cys 186), Q=GRK2 (Cys 34), R=human DPR-1 (Cys 644), S=Ser/Thr protein phosphatase (Cys 228), T=dynamain (Cys 95). All but two have acidic residues pointing away with respect to the Cys functional group: two proteins (with NO-Cys numbering in brackets) are separately shown in the grey panel (panels S and T). This figure gives an immediate idea that whenever the acidic residue is flanking NO-Cys, in the three dimensional structure its distance and positioning of charged atoms are in the outward direction (i.e., going far from the sulfur atom).

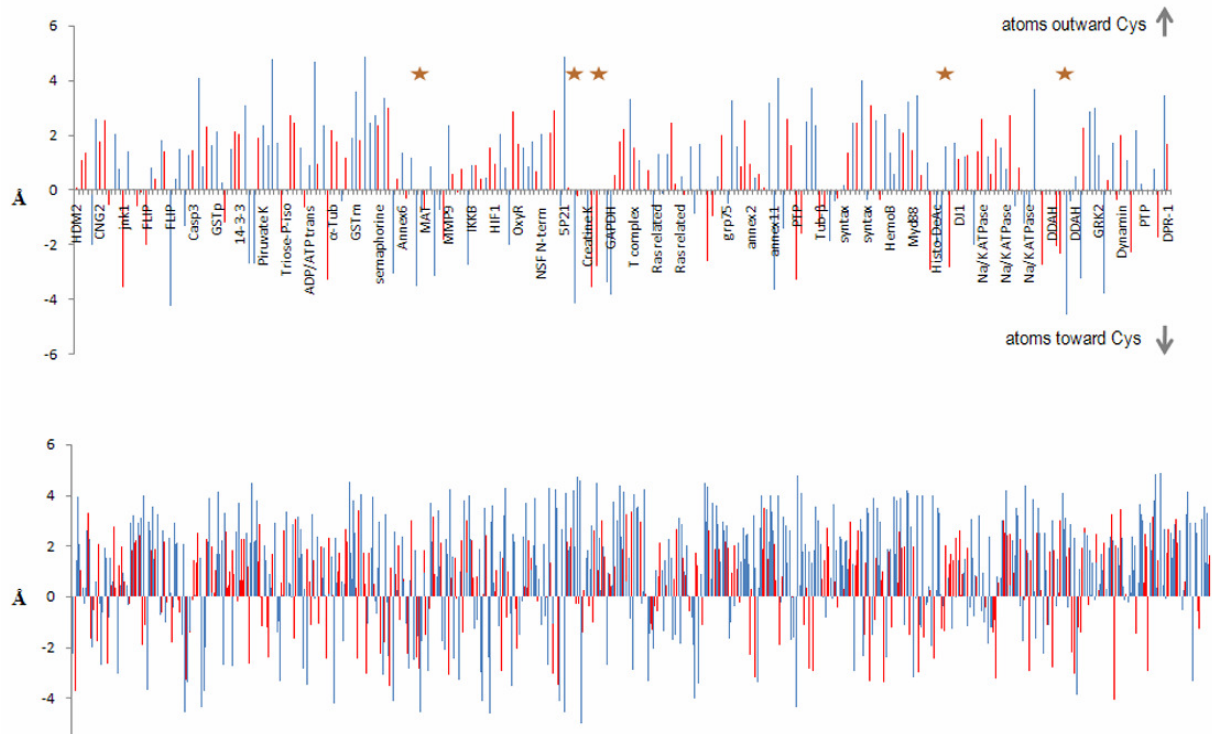

**Figure S5: Orientation of charged functional groups relative to NO-Cys.** Distribution of functional groups of basic (blue lines) and acidic (red lines) residues relative to the Cys sulfur atom, for both NO-Cys and a control set of non-modifiable Cys. Negative values (in Å, Y-axis) indicate that the charged atom points toward the Cys. In the X-axis, the corresponding proteins are indicated (for clarity, only for the NO-Cys set). A few proteins having NO-Cys with acidic and basic residues pointing toward the Cys are marked by a star. Details are given in the main text.

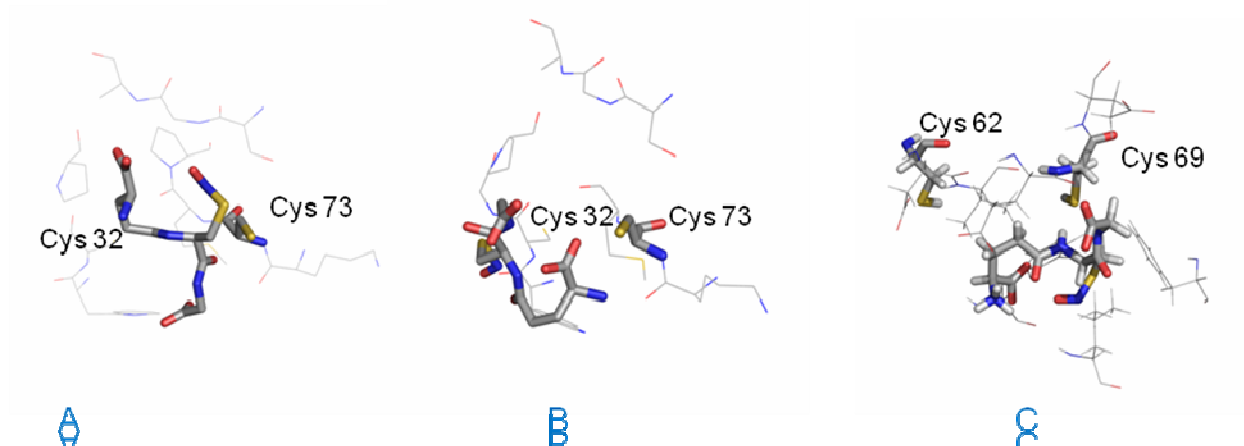

**Figure S6: Docking GSNO to thioredoxin 1.** (A) A model of GSNO (in stick representation) interacting with Cys 73 (in stick and labeled). This position is described in the main text and Table 2. GSNO favorably docks onto thioredoxin 1 in the region between Cys 73 and Cys 32 (the catalytic Cys). Two alternative models were found: one shown in (A), characterized by a S-S distance of 2.5 Å and interaction of -3.9 kcal/mol, and a non-reactive model (B) which shows GSNO oriented with its functional group toward Cys 32 (but at about 4 Å distance). (C) The best docking model of GSNO oriented toward Cys 69 and Cys 62 (both in stick and labeled). This model, even if characterized by a better energy score (-7 kcal/mol) than those in panels A and B, is not reactive. Thus, the Cys 69-Cys 62 region shows good affinity for GSNO, but in our calculations we did not find a consistent reactive model (especially, for Cys 62, which was always more distant than Cys 69 from GSNO).

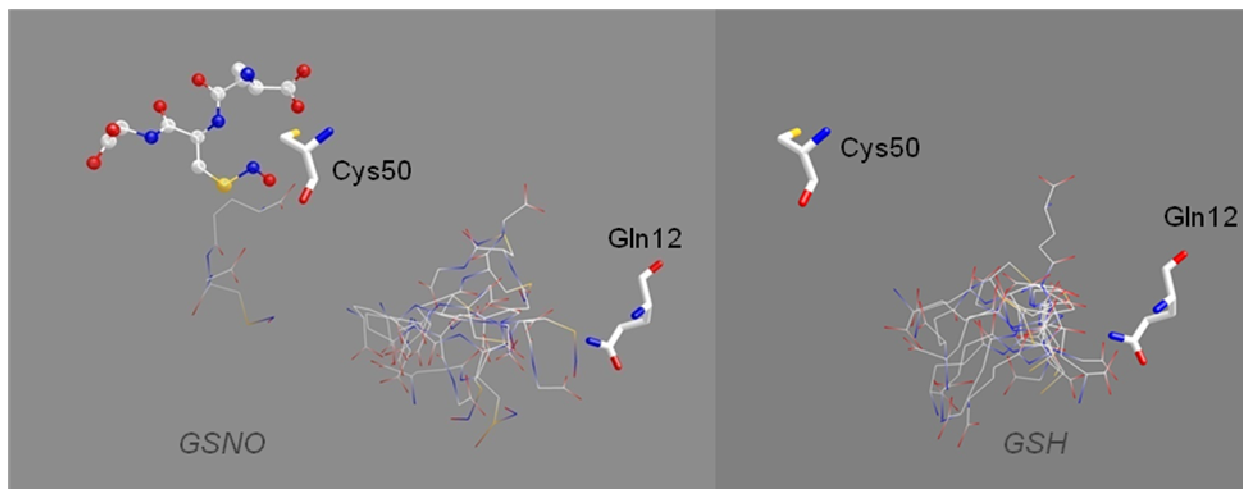

**Figure S7: GSTt affinity for GSNO and GSH.** Calculated docking reactivity of GSTt (in the dimer form) is shown for GSNO (left panel) and GSH (right). The modifiable Cys 50 and Gln 12 (taken as a reference for the natural binding site of GSH in this protein, Rossjohn et al, 1998) are shown in sticks. As can be seen from the figure, while GSH shows affinity for its natural binding site, GSNO has potential alternative models, bringing the substrate near Cys 50. However, as discussed in the text, among the first ranked docking positions only the cluster of models near Gln 12 is also found for GSNO. The reactive modes, proximal to Cys 50, are found at higher energy: for the model shown in balls and sticks, the associated energy value was  $-2.7$  kcal/mol, but it was only ranked as the 32<sup>nd</sup> possible position.

**Table S1. The dataset of NO-Cys containing proteins**

| Source                        | ID       | Protein name                                            | NO-Cys number | Hydr 6A | Hydr 13aa | pKa  | 6A q+/q- | 8A q+/q- | SG(exp,1.2A) | Cys conservation | template (% id) | modeling coverage |
|-------------------------------|----------|---------------------------------------------------------|---------------|---------|-----------|------|----------|----------|--------------|------------------|-----------------|-------------------|
| <i>Homo sapiens</i>           | P10599   | Thioredoxin1                                            | 69            | 1.06    | -0.25     | 9.5  |          | Y        | 0            | 25%              | 2hsh (100%)     | 1-105             |
| <i>Homo sapiens</i>           | P10599   | Thioredoxin1                                            | 73            | -0.2    | -0.06     | 8.4  |          | Y        | 23           | 16%              | 2hsh (100%)     | 1-105             |
| <i>Mus musculus</i>           | O35099   | cyclic nucleotide gated channel alpha 2                 | 460           | 0.72    | 0.94      | 8.5  | Y        | Y        | 0.5          | 51%              | 1q3e (35%)      | 381-580           |
| <i>Mus musculus</i>           | O35099   | Mitogen-activated protein kinase kinase kinase 5 (ASK1) | 869           | 0.23    | 1.05      | 11.2 |          | Y        | 0            | 100%             | 2clq (100%)     | 670-940           |
| <i>Homo sapiens</i>           | P45983   | Mitogen-activated protein kinase (JNK1)                 | 116           | -0.26   | 0.53      | 9    | Y        | Y        | 45           | 42%              | 2h96 (99%)      | 7-364             |
| <i>Pseudomonas aeruginosa</i> | Q02J31   | Dimethylarginine dimethylaminohydrolase                 | 273           | 0.027   | 1.56      | 7.8  |          | Y        | 21.5         | 83%              | 2jaj (100%)     | 8 - 281           |
| <i>Homo sapiens</i>           | P10415   | Apoptosis regulator Bcl-2                               | 158           | 2.15    | 0.24      | 10.3 | Y        | Y        | 12.98        | 75%              | 2o2f (100%)     | 92-204            |
| <i>Homo sapiens</i>           | O15519-8 | FADD-like apoptosis regulator isoform 1                 | 254           | 0.24    | 1.57      | 11.5 |          | Y        | 0            | 72%              | 3deh (23%)      | 244-477           |
| <i>Homo sapiens</i>           | O15519-8 | FADD-like apoptosis regulator isoform 1                 | 259           | 3       | 0.9       | 9    |          | Y        | 37.65        | 18%              | 3deh (23%)      | 244-477           |
| <i>Homo sapiens</i>           | P42574   | Caspase-3                                               | 163           | -0.84   | 0.58      | 6.18 |          | Y        | 19.3         | 97%              | 1cp3 (100%)     | 35-277            |
| <i>Homo sapiens</i>           | P29466   | Caspase-1                                               | 285           | -0.23   | 0.56      | 5.87 |          | Y        | 22.36        | 99%              | 2h4y (100%)     | 119-298           |
| <i>Rattus norvegicus</i>      | Q07009   | Calpain 2, large subunit                                | 301           | -1.7    | -1.27     | 7.66 |          | Y        | 26.7         | 16%              | 1kfu (93%)      | 2-700             |
| <i>Rattus norvegicus</i>      | P30713   | Glutathione S-transferase theta 2                       | 50            | -0.38   | 0.077     | 8.22 |          |          | 42           | 0%               | 1ljr(78%)       | 1-244             |
| <i>Rattus norvegicus</i>      | P04906   | Glutathione S-transferase P                             | 48            | -0.125  | 0.038     | 9.05 |          |          | 1.01         | 38%              | 1glqA (92%)     | 2-210             |
| <i>Rattus norvegicus</i>      | P63329   | Serine/threonine protein phosphatase 2B                 | 228           | -0.12   | 0.06      | 13.1 |          |          | 4.8          | 100%             | 1AUI (99%)      | 2 to 381          |
| <i>Rattus norvegicus</i>      | P63102   | 14-3-3 protein                                          | 94            | 0.97    | 0.2       | 10.4 |          | Y        | 0            | 96%              | 2c1j (99%)      | 2-210             |
| <i>Rattus norvegicus</i>      | P14152   | Malate dehydrogenase, cytoplasmic                       | 137           | 1.8     | -0.7      | 11.9 |          |          | 0            | 29%              | 5MDH (95%)      | 2-334             |



|                          |          |                                                |     |       |       |       |   |   |      |      |                |           |
|--------------------------|----------|------------------------------------------------|-----|-------|-------|-------|---|---|------|------|----------------|-----------|
| <i>Rattus norvegicus</i> | P11980   | Pyruvate kinase, isozymes M1/M2                | 358 | 1.8   | 0.8   | 12.9  |   | Y | 0    | 93%  | 2g50D (95%)    | 11 - 531  |
| <i>Rattus norvegicus</i> | P48500   | Triosephosphate isomerase                      | 21  | -1.53 | -0.08 | 5.75  | Y | Y | 20   | 6%   | 1r2r (95%)     | 3 to 249  |
| <i>Rattus norvegicus</i> | P48500   | Triosephosphate isomerase                      | 27  | 1.4   | -0.05 | 7.51  |   | Y | 29.8 | 5%   | 1r2r (95%)     | 3 to 249  |
| <i>Rattus norvegicus</i> | P46460   | Vesicle-fusing ATPase C-terminal               | 250 | 0.025 | 0.23  | 9.1   |   | Y | 42   | 36%  | 3cf1 (33%)     | 220 - 465 |
| <i>Rattus norvegicus</i> | P46460   | Vesicle-fusing ATPase C-terminal               | 264 | 0.072 | 0.41  | 4.7   |   | Y | 0    | 25%  | 3cf1 (33%)     | 220 - 465 |
| <i>Rattus norvegicus</i> | Q05962   | ADP/ATP translocase                            | 160 | 1.07  | 0.3   | 10.1  |   | Y | 0    | 96%  | 1okc (96%)     | 3 - 294   |
| <i>Rattus norvegicus</i> | Q05962   | ADP/ATP translocase                            | 257 | -0.5  | -0.5  | 10.2  |   | Y | 0    | 100% | 1okc (96%)     | 3 - 294   |
| <i>Rattus norvegicus</i> | P06687   | Sodium/potassium-transporting ATPase           | 49  | 2.4   | -1.13 | 8.54  |   | Y | 1.4  | 6%   | 3b8e (87.5%)   | 16 - 1013 |
| <i>Rattus norvegicus</i> | P06687   | Sodium/potassium-transporting ATPase           | 364 | 2.4   | -0.49 | 14.16 |   | Y | 0    | 99%  | 3b8e (87.5%)   | 16 - 1013 |
| <i>Rattus norvegicus</i> | P06687   | Sodium/potassium-transporting ATPase           | 695 | 2.6   | 0.76  | 10.6  |   | Y | 0.9  | 96%  | 3b8e (87.5%)   | 16 - 1013 |
| <i>Rattus norvegicus</i> | Q6P9V9   | Tubulin alpha                                  | 295 | 1.9   | -0.35 | 11.2  |   | Y | 0    | 65%  | 1sa0 (100%)    | 2-437     |
| <i>Rattus norvegicus</i> | Q6P9V9   | Tubulin alpha                                  | 347 | 0.83  | 0.5   | 9.1   |   | Y | 22   | 96%  | 1sa0 (100%)    | 2-437     |
| <i>Rattus norvegicus</i> | Q6P9V9   | Tubulin alpha                                  | 376 | 2.2   | 0.06  | 12.25 |   | Y | 0    | 99%  | 1sa0 (100%)    | 2-437     |
| <i>Homo sapiens</i>      | P09488   | Glutathione S-transferase Mu 1                 | 173 | 0.1   | -0.3  | 8.92  | Y | Y | 0.1  | 86%  | 1GTU (100%)    | 2-218     |
| <i>Homo sapiens</i>      | Q92854   | Semaphorin 4D                                  | 135 | -0.14 | -1.46 | 11.45 |   | Y | 0    | 92%  | 1olz(100%)     | 22-678    |
| <i>Homo sapiens</i>      | P35557-2 | Glucokinase                                    | 371 | 1.2   | -0.43 | 12.24 | Y | Y | 0    | 98%  | 1v4s (99%)     | 16-465    |
| <i>Homo sapiens</i>      | P08133   | Annexin-6                                      | 114 | -0.18 | 0.76  | 10.8  | Y | Y | 2.6  | 32%  | 1m9i (100%)    | 10-673    |
| <i>Rattus norvegicus</i> | P13444.2 | S-adenosylmethionine synthetase isoform type-1 | 121 | 0.59  | -0.32 | 7.45  | Y | Y | 22.8 | 5%   | 1qm4 (99%)     | 17 - 397  |
| <i>Homo sapiens</i>      | P14780   | Matrix metalloproteinase 9 preproprotein       | 99  | -1.05 | -0.23 | 1     | Y | Y | 4.1  | 99%  | 1ck7.pdb (44%) | 26 to 704 |
| <i>Homo sapiens</i>      | Q1HE21   | Iron-responsive element                        | 178 | -0.55 | -0.53 | 8.95  |   | Y | 41   | 61%  | (2b3x) 56%     | 9-963     |

|                                |          |                                                         |     |       |       |       |   |   |      |     |             |            |
|--------------------------------|----------|---------------------------------------------------------|-----|-------|-------|-------|---|---|------|-----|-------------|------------|
|                                |          | binding protein 2                                       |     |       |       |       |   |   |      |     |             |            |
| <i>Homo sapiens</i>            | O14920.1 | Inhibitor of nuclear factor kappa-B kinase subunit beta | 179 | -6    | 0.48  | 7.6   | Y | Y | 5.2  | 70% | 2acx (26%)  | 15 - 288   |
| <i>Arabidopsis thaliana</i>    | Q949U7.2 | Peroxiredoxin-2E                                        | 121 | -0.49 | -0.39 | 1.9   |   |   | 1.5  | 99% | 1tp9 (60%)  | 71-234     |
| <i>Escherichia coli</i>        | Q1R3U8   | Oxidative stress transcriptional regulator (OxyR)       | 113 | 0.49  | -0.49 | 8.9   | Y | Y | 0.4  | 91% | 1i6a (99%)  | 1 to 212   |
| <i>Rattus norvegicus</i>       | P46459   | Vesicle-fusing ATPase N-terminal                        | 21  | -0.52 | 0.06  | 9.35  |   | Y | 7.6  | 55% | 1qcsA (91%) | 1 - 201    |
| <i>Rattus norvegicus</i>       | P46459   | Vesicle-fusing ATPase N-terminal                        | 91  | 0.87  | 0.19  | 9.1   |   | Y | 9.88 | 88% | 1qcsA (91%) | 1 - 201    |
| <i>Homo sapiens</i>            | P01112   | Ras p21 Protein                                         | 118 | -2    | 0.43  | 8.72  | Y | Y | 10.3 | 67% | 5p21 (100%) | 1-166      |
| <i>Rattus norvegicus</i>       | P07335   | Creatine kinase                                         | 283 | 0.29  | 0.71  | 8.15  |   | Y | 23.7 | 98% | 1GOW (96%)  | 2 to 381   |
| <i>Rattus norvegicus</i>       | P04797   | GAPDH                                                   | 150 | -1.1  | 0.85  | 5.35  |   |   | 19.5 | 98% | 1u8f (94%)  | 2 to 333   |
| <i>Rattus norvegicus</i>       | P04797   | GAPDH                                                   | 245 | 1.63  | 0.13  | 10.15 | Y | Y | 0    | 57% | 1u8f (94%)  | 2 to 333   |
| <i>Homo sapiens</i>            | P18206   | Vinculin                                                | 85  | 1.72  | 0.29  | 8.72  |   | Y | 18.3 | 69% | 1tr2 (88%)  | 1 to 1130  |
| <i>Homo sapiens</i>            | P40227   | T-complex protein 1 subunit zeta                        | 406 | 0.26  | 0.44  | 9.5   |   | Y | 0    | 75% | 1q3r (38%)  | 19 to 524  |
| <i>Homo sapiens</i>            | P20337   | Ras-related protein Rab-3B                              | 184 | 0.65  | -0.07 | 8.6   |   | Y | 9.4  | 27% | 2gf9 (86%)  | 20 to 189  |
| <i>Homo sapiens</i>            | P23284   | Peptidylprolyl isomerase B                              | 202 | 0     | 0.61  | 9.15  |   | Y | 3.8  | 60% | 1cyn (100%) | 39 to 216  |
| <i>Homo sapiens</i>            | P35579   | Myosin heavy chain 9                                    | 91  | -0.62 | 0.33  | 10.3  |   | Y | 8.6  | 41% | 2aka (48%)  | 8 to 782   |
| <i>Homo sapiens</i>            | P38646   | Stress-70 protein                                       | 487 | 0.36  | -0.7  | 10.75 | Y | Y | 1.9  | 21% | 1yuw (55%)  | 52 to 597  |
| <i>Homo sapiens</i>            | P53621   | COPA protein                                            | 245 | -1.02 | -1.3  | 10.8  |   | Y | 1.6  | 34% | 2ovr (34%)  | 67 to 287  |
| <i>Homo sapiens</i>            | P07355   | Annexin-2                                               | 133 | 1.77  | 0.077 | 12.8  |   | Y | 0    | 34% | 1w7b (100%) | 21 to 339  |
| <i>Homo sapiens</i>            | P50995   | Annexin-11                                              | 294 | -0.05 | 1.17  | 9.3   | Y | Y | 4.4  | 25% | 1ann (59%)  | 192 to 505 |
| <i>Homo sapiens</i>            | Q6IPS9   | Elongation factor alpha 1                               | 234 | 1.73  | 0.66  | 9.96  |   | Y | 12.7 | 17% | 1f60 (81%)  | 2 to 443   |
| <i>Yersinia enterocolitica</i> | P15273   | Protein Tyrosine Phosphatase                            | 215 | -0.16 | 0.77  | 1.8   |   | Y | 2    | 84% | 2cni (100%) | 1 to 300   |

|                          |          |                                                        |     |          |       |       |   |   |       |      |             |            |
|--------------------------|----------|--------------------------------------------------------|-----|----------|-------|-------|---|---|-------|------|-------------|------------|
| <i>Homo sapiens</i>      | Q16623   | Syntaxin 1A                                            | 145 | 9.38     | -2.14 | 9.3   | Y | Y | 0.2   | 27%  | 3c98 (99%)  | 1-267      |
| <i>Homo sapiens</i>      | Q99836   | Myeloid differentiation primary response protein MyD88 | 216 | 0.4      | 0.07  | 10.72 |   | Y | 0     | 30%  | 2js7(100%)  | 146-296    |
| <i>Homo sapiens</i>      | P68871.2 | Hemoglobin subunit beta                                | 293 | -0.15    | -0.32 | 6.8   | Y | Y | 0     | 100% | 1dxt (100%) | 1-147      |
| <i>Rattus norvegicus</i> | P69897   | Tubulin beta                                           | 12  | -0.69    | -0.25 | 11.25 |   |   | 12.4  | 99%  | 1sa0 (100%) | 2-438      |
| <i>Rattus norvegicus</i> | P69897   | Tubulin beta                                           | 241 | 1.025    | 0.2   | 8.63  |   | Y | 17.6  | 88%  | 1sa0 (100%) | 2-438      |
| <i>Rattus norvegicus</i> | P69897   | Tubulin beta                                           | 305 | 0.76     | -1.1  | 10.73 |   | Y | 0     | 65%  | 1sa0 (100%) | 2-438      |
| <i>Rattus norvegicus</i> | P69897   | Tubulin beta                                           | 356 | 0.24     | -0.19 | 6.8   |   | Y | 6.05  | 100% | 1sa0 (100%) | 2-438      |
| <i>Homo sapiens</i>      | Q92769   | Histone deacetylase 2                                  | 262 | 1.24     | 0.9   | 15    |   | Y | 0     | 83%  | 1t64 (41%)  | 13-374     |
| <i>Homo sapiens</i>      | Q92769   | Histone deacetylase 2                                  | 274 | 0.82     | -0.05 | 6     | Y | Y | 13    | 94%  | 1t64 (41%)  | 13-374     |
| <i>Homo sapiens</i>      | O88767   | Parkinson disease protein 7 (DJ1)                      | 46  | 1.04     | -0.16 | 8.91  |   | Y | 0     | 28%  | 1ps4 (92%)  | 1 to 189   |
| <i>Homo sapiens</i>      | O88767   | Parkinson disease protein 7 (DJ1)                      | 53  | 1.6      | 0.02  | 9     |   | Y | 44    | 20%  | 1ps4 (92%)  | 1 to 189   |
| <i>Homo sapiens</i>      | P50570   | Dynamin-2                                              | 607 | 0.933333 | -0.73 | 15    |   | Y | 0.19  | 100% | 2ys1 (100%) | 516 to 621 |
| <i>Mus musculus</i>      | Q4FJR9   | SG15 ubiquitin-like modifier                           | 76  | -1.76    | 0.86  | 9.05  |   | Y | 27.4  | 1%   | 1z2m (63%)  | 3 to 151   |
| <i>Homo sapiens</i>      | P25098   | G-protein coupled receptor kinase 2 (GRK2)             | 340 | 0.55     | -0.46 | 7.5   |   | Y | 20.6  | 53%  | 3cik (100%) | 29 to 669  |
| <i>Homo sapiens</i>      | O00429   | Dynamin-related protein 1                              | 644 | -1.31    | -1.09 | 8.37  |   | Y | 30.44 | 100% | 2j69(12.1%) | 1 to 736   |

**LEGEND:**

Hydr 6A: average hydrophobicity (Kyte-Doolittle scale) of the 6 A region surrounding NO-Cys

Hydr 13 aa: average hydrophobicity (Kyte-Doolittle scale) of the primary sequence flanking the NO-Cys (6aa downstream and 6 aa upstream the Cys)

6A q+/q- = proteins presenting at least one positively charged (q+) AND one negatively charged (q-) amino acid in within 6A form NO-Cys sulfur atom: protein presenting the feature are labeled with "Y"

8A q+/q- = proteins presenting at least one q+ AND one q- within 8A form NO-Cys sulfur atom: protein presenting the feature are labeled with "Y"

SG (exp,1.2A) = sulfur atom exposure, calculated using a molecular probe of 1.2 A radius

Template (% id) = percentage of amino acid identity with the template used for the modeling session

Modeling coverage = coverage of the structural model in respect to the full length protein sequence (number indicates AA positions in respect to the full protein sequence)

**Table S2. Exposed regions surrounding the NO-Cys sites**

| Protein name                                            | NO-Cys number | Amino acids of the Exposed 8Å region (8A region)                                                                                                | 8A region conservation | NO-Cys conservation |
|---------------------------------------------------------|---------------|-------------------------------------------------------------------------------------------------------------------------------------------------|------------------------|---------------------|
| Thioredoxin1                                            | 69            | PHE 11,LEU 15,CYS 62,ASP 64,VAL 65,ALA 66,SER 67,GLU 68,CYS 69,GLU 70,VAL 71,PHE 80,LYS 85                                                      | 45%                    | 25%                 |
| Thioredoxin1                                            | 73            | GLU 70,VAL 71,LYS 72,CYS 73,MET 74,THR 76,PHE 89,SER 90,ASER 90,GLY 91                                                                          | 58%                    | 16%                 |
| Cyclic nucleotide gated channel alpha 2                 | 460           | LEU 451, VAL 454, ARG 455, ILE 456, GLN 458, ASP 459, CYS 460, GLU 461, ALA 462, GLY 463, LEU 464, ALA 568, VAL 571                             | 69%                    | 51%                 |
| Mitogen-activated protein kinase kinase kinase 5 (ASK1) | 869           | THR 842,LEU 843,GLN 844,TYR 845,MET 846,ILE 872,GLU 873,PRO 879,PHE 881,VAL 899,HIS 900,PRO 901,PHE 919                                         | 75%                    | 100%                |
| Mitogen-activated protein kinase (JNK1)                 | 116           | ASN 114,CYS 116,GLN 117,VAL 118,ILE 119,GLN 120,LYS 153,PRO 154,SER 155,ASN 156,TYR 191,GLU 217,ILE 223                                         | 80%                    | 42%                 |
| Dimethylarginine dimethylaminohydrolase                 | 273           | PHE 75,GLU 77,ASP 78,ARG 97,GLY 128,HIS 172,LYS 174,SER 175,VAL 267,ASP 268,AASP 268,LEU 270,THR 272,CYS 273,SER 275                            | 32%                    | 83%                 |
| Apoptosis regulator Bcl-2                               | 158           | TYR 18,HIS 20,LYS 22,LEU 23,TRP 30,GLU 152,PHE 153,VAL 156,VAL 159,GLU 160,VAL 162,SER 167,LEU 169,ASP 171,ALA 174                              | 64%                    | 75%                 |
| FADD-like apoptosis regulator isoform 1                 | 254           | GLY 252,LEU 255,ILE 257,ASP 258,LEU 267,ARG 268,THR 270,PHE 271,THR 272,TYR 276,GLU 277,VAL 278,GLN 279,LYS 280,VAL 309,CYS 310,VAL 311,MET 354 | 67%                    | 72%                 |
| FADD-like apoptosis regulator isoform 1                 | 259           | ILE 257,ASP 258,CYS 259,ILE 260,GLY 261,ARG 268,GLN 279,LYS 280,PHE 281,LEU 282,HIS 283                                                         | 53%                    | 18%                 |
| Caspase-3                                               | 163           | ARG 64,SER 120,HIS 121,GLY 122,GLU 123,PHE 128,GLN 161,CYS 163,ARG 164,GLY 165,THR 166,GLU 167,TYR 203,TYR 204,SER 205,TRP 206,ARG 207          | 65%                    | 97%                 |
| Caspase-1                                               | 285           | GLU 219,PHE 221,ALA 222,HIS 223,ARG 224,LYS 228,ASN 278,MET 279,ASN 281,THR 282,LYS 283,ASN 284,PRO 286,SER 287,LYS 289,ASP 290,LYS 293         | 60%                    | 99%                 |
| Calpain 2, large subunit                                | 301           | THR 254,TRP 293,THR 294,GLY 295,LYS 296,ASN 298,ASP 299,ASN 300,CYS 301,PRO 302,SER 303                                                         | 60%                    | 16%                 |
| Glutathione S-transferase theta 2                       | 50            | THR 254,TRP 293,THR 294,GLY 295,LYS 296,ASN 298,ASP 299,ASN 300,CYS 301,PRO 302,SER 303                                                         | 30%                    | 0%                  |
| Glutathione S-transferase P                             | 48            | VAL 7,VAL 34,TRP 39,SER 43,LEU 44,LYS 45,SER 46,THR 47,CYS 48,LEU 49,TYR 50,GLY 51,GLN 52,LEU 53,PRO 54,LYS 55,TYR 64                           | 50%                    | 38%                 |
| Serine/threonine protein phosphatase 2B                 | 228           | ASN 150,PRO 221,PRO 222,ALA 223,TYR 224,GLY 225,PRO 226,MET 227,CYS 228,ASP 229,TRP 232,CYS 256,SER 257,TYR 258                                 | 90%                    | 100%                |
| 14-3-3 protein                                          | 94            | TYR 48,ARG 55,ARG 56,GLU 87,GLU 89,ARG 91,ASP 92,ILE 93,ASN 95,ASP 96,LEU 98,ASP 124,TYR 125,TYR 126,ARG 127,TYR 128,LEU 129,GLU 131,VAL 132    | 87%                    | 96%                 |
| Malate dehydrogenase, cytoplasmic                       | 137           | VAL 129,GLY 130,THR 139,SER 141,LYS 149,ASN 151,SER 153,LEU 155,MET 269,VAL 271,ILE 272                                                         | 56%                    | 29%                 |
| Pyruvate kinase, isozymes M1/M2                         | 358           | ARG 43,ASN 44,GLY 46,ASN 70,MET 360,GLN 462,HIS 464,LEU 465,TYR 466,ARG 467,GLY 468                                                             | 60%                    | 93%                 |
| Triosephosphate isomerase                               | 21            | ASN 16,GLY 17,ARG 18,LYS 19,LYS 20,CYS 21,LEU 22,GLY 23,GLU 24,LEU 25,TYR 48,LEU 237                                                            | 73%                    | 6%                  |
| Triosephosphate isomerase                               | 27            | LYS 20,CYS 21,LEU 22,GLY 23,GLU 24,LEU 25,ILE 26,CYS 27,THR 28,ASN 30,ALA 31                                                                    | 66%                    | 5%                  |

|                                                         |     |                                                                                                                                                                           |     |      |
|---------------------------------------------------------|-----|---------------------------------------------------------------------------------------------------------------------------------------------------------------------------|-----|------|
| Vesicle-fusing ATPase C-terminal                        | 250 | ILE 25,VAL 26,GLN 28,MET 29,GLY 30,CYS 31,LYS 32,HIS 33, GLU 143                                                                                                          | 65% | 36%  |
| Vesicle-fusing ATPase C-terminal                        | 264 | LEU 4,GLU 7,TYR 40,GLY 41,PRO 42,PRO 43,GLY 44,CYS 45,GLY 46,LYS 47,THR 48,LEU 50,MET 153,THR 154,ASN 155,GLU 175,ILE 176,GLY 177,LEU 178,PRO 179,SER 218,GLY 219,ALA 220 | 68% | 25%  |
| ADP/ATP translocase                                     | 160 | PRO 133,LEU 134,ASP 135,ARG 138,ARG 140,LEU 141,GLU 153,PHE 154,ASN 155,GLY 156,LEU 157,GLY 158,ASP 159,LEU 161,THR 162,LYS 163,ILE 164,PHE 165,LEU 173                   | 80% | 96%  |
| ADP/ATP translocase                                     | 257 | PRO 230,PHE 231,ARG 235,ARG 236,MET 238,GLN 241,MET 250,TYR 251,THR 252,GLY 253,THR 254,VAL 255,ASP 256,TRP 258,ARG 259,LYS 260,ALA 262,GLU 265,PHE 270                   | 81% | 100% |
| Sodium/potassium-transporting ATPase                    | 49  | VAL 38,CYS 42,THR 47,ASP 48,CYS 49,VAL 50,GLN 51,GLY 52,ARG 245                                                                                                           | 70% | 6%   |
| Sodium/potassium-transporting ATPase                    | 364 | THR 362,ASP 366,LYS 688,ILE 691,VAL 692,CYS 695                                                                                                                           | 80% | 99%  |
| Sodium/potassium-transporting ATPase                    | 695 | THR 362,GLU 693,CYS 695,GLN 696,ARG 697,GLN 698,GLY 699                                                                                                                   | 78% | 96%  |
| Tubulin alpha                                           | 295 | THR 271,ALA 273,PRO 274,GLU 290,ILE 291,ASN 293,ALA 294,CYS 295,PHE 296,GLU 297,ASN 300,MET 377                                                                           | 92% | 65%  |
| Tubulin alpha                                           | 347 | ASN 258,LEU 259,PRO 261,TYR 262,TYR 312,ALA 314,CYS 315,PHE 343,VAL 344,ASP 345,TRP 346,CYS 347,PRO 348,THR 349,GLY 350,LYS 352                                           | 97% | 96%  |
| Tubulin alpha                                           | 376 | LEU 269,THR 271,ALA 273,CYS 295,MET 377                                                                                                                                   | 91% | 99%  |
| Glutathione S-transferase Mu 1                          | 173 | LEU 127,LEU 130,PRO 131,ASP 164,ARG 167,ILE 168,PHE 169,GLU 170,PRO 171,LYS 172,CYS 173,LEU 174,ASP 175,PHE 177                                                           | 54% | 86%  |
| Semaphorin 4D                                           | 135 | TRP 66,TYR 90,ARG 92,ASN 108,GLN 111,PRO 112,ALA 113,LYS 132,GLY 133,ARG 134,PHE 137,ASP 138,TYR 143                                                                      | 63% | 92%  |
| Glucokinase                                             | 371 | ARG 303,PHE 330,GLU 331,THR 332,ARG 333,PHE 334,SER 336,GLN 337,GLU 339,ILE 348,ILE 351,CYS 364,ILE 366,ARG 368,ARG 369,GLU 372,SER 373,HIS 416                           | 41% | 98%  |
| Annexin-6                                               | 114 | ASP 97,LYS 99,GLU 100,LYS 102,ASP 103,ALA 104,ILE 105,ASP 111,GLU 112,LYS 113,CYS 114,ILE 116,GLU 117,LEU 119,ARG 122,ASN 272,THR 273,ARG 276                             | 54% | 32%  |
| S-adenosylmethionine synthetase isoform type-1          | 121 | ASN 52,LYS 54,THR 73,PRO 116,ASP 117,ILE 118,ALA 119,GLN 120,CYS 121,VAL 122,HIS 123,LEU 124,ASP 125,THR 289,LYS 290                                                      | 75% | 5%   |
| matrix metalloproteinase 9 preproprotein                | 99  | TYR 52,ARG 98,CYS 99,GLY 100,VAL 101,PRO 102,ASP 103,GLN 108,LEU 187,LEU 188,ALA 189,HIS 190,ALA 191,HIS 203,VAL 398,HIS 401,GLU 402,HIS 405,HIS 411,MET 422              | 83% | 99%  |
| iron-responsive element binding protein 2               | 178 | THR 173, ARG 175, GLY 176,SER 177,CYS 178,ASP 179,SER 180,ASN 186,SER 187                                                                                                 | 62% | 61%  |
| inhibitor of nuclear factor kappa-B kinase subunit beta | 179 | ILE 142,ARG 144,LYS 171,GLU 172,LEU 173,ASP 174,SER 177,LEU 178,CYS 179,THR 180,SER 181,GLN 197,LYS 198,TYR 199,THR 200,VAL 201                                           | 79% | 70%  |
| Peroxisredoxin-2E                                       | 121 | PRO 114,ALA 116,PHE 117,THR 118,PRO 119,THR 120,CYS 121,SER 122,GLN 123,LYS 124,HIS 125,VAL 126,CYS 146,ASN 150,TRP 158,LEU 195,ARG 198,ARG 201,GLY 220                   | 75% | 99%  |
| Oxidative stress transcriptional regulator (OxyR)       | 113 | MET 107,LEU 108,GLU 109,ASP 110,GLY 111,HIS 112,CYS 113,LEU 114,ARG 115,ASP 116,GLN 117,PHE 121,PHE 123,GLU 129,ARG 134                                                   | 47% | 91%  |
| Vesicle-fusing ATPase N-terminal                        | 21  | GLU 15, LEU 16,LEU 18,THR 19,CYS 21,SER 31,GLY 32,GLN 33,THR 48,LEU 49,LYS 50,THR 51,GLN                                                                                  | 77% | 55%  |

|                                                        |     |                                                                                                                                                                 |     |      |
|--------------------------------------------------------|-----|-----------------------------------------------------------------------------------------------------------------------------------------------------------------|-----|------|
|                                                        |     | 124,ASN 126,ASN 127,GLN 128                                                                                                                                     |     |      |
| Vesicle-fusing ATPase N-terminal                       | 91  | PHE 85,ASP 86,LYS 87,ALA 88,LYS 89,GLN 90,CYS 91,GLY 93,ASN 127,MET 155,ASP 156,VAL 178,ASN 180,SER 181                                                         | 75% | 88%  |
| Ras p21 Protein                                        | 118 | ASN 116,LYS 117,CYS 118,ASP 119,LEU 120,ARG 123,ILE 142,GLU 143,ALA 146,THR 148,ARG 149,GLN 150,GLY 151                                                         | 71% | 67%  |
| Creatine kinase                                        | 283 | THR 59,THR 71,VAL 72,GLY 73,ALA 74,VAL 75,TYR 82,ARG 96,LEU 202,GLU 232,THR 282,CYS 283,SER 285,ASN 286                                                         | 77% | 98%  |
| GAPDH                                                  | 150 | ILE 12,SER 149,CYS 150,THR 151,THR 175,HIS 177,THR 180,THR 209,ALA 211,ARG 232,SER 239,ASN 314,GLU 315,TYR 318                                                  | 72% | 98%  |
| GAPDH                                                  | 245 | HIS 163,PHE 166,GLY 167,VAL 169,GLU 170,GLY 171,LEU 172,LEU 226,THR 244,ARG 246,ASN 304,PHE 305,VAL 306,LYS 307                                                 | 89% | 57%  |
| Vinculin                                               | 85  | VAL 44,ALA 45,GLN 48,ALA 49,VAL 51,SER 52,VAL 81,GLU 82,ASN 83,ALA 84,CYS 85,THR 86,LYS 87,VAL 89,GLN 90                                                        | 91% | 69%  |
| T-complex protein 1 subunit zeta                       | 406 | GLU 135,GLU 136,VAL 137,LYS 138,VAL 139,SER 140,ARG 141,ASN 400,ASP 404,GLY 405,CYS 406,VAL 407,ASP 496,ASN 497,TYR 498,CYS 499,LYS 502                         | 58% | 75%  |
| Ras-related protein Rab-3B                             | 184 | TYR 21,PHE 23,ARG 66,HIS 67,LYS 69,VAL 71,MET 96,GLU 177,ARG 178,LEU 179,ASP 181,ALA 182,ILE 183,CYS 184,ASP 185,LYS 186,MET 187,SER 188                        | 47% | 27%  |
| peptidylprolyl isomerase B                             | 202 | TYR 47,ASP 49,VAL 77,ALA 78,THR 81,GLY 82,GLY 87,LYS 89,ASN 90,SER 91,ALA 200,ASP 201,CYS 202,GLY 203,LYS 204                                                   | 62% | 60%  |
| Myosin heavy chain 9                                   | 91  | LEU 31,ILE 72,GLN 73,LYS 74,MET 75,ASN 76,PRO 77,PHE 80,LEU 89,CYS 91,LEU 92,ASN 93,SER 96,ALA 765,GLY 766,VAL 767,LEU 768,ALA 769,HIS 770,GLU 773              | 75% | 41%  |
| Stress-70 protein                                      | 487 | GLU 448,THR 449,GLY 452,VAL 453,PHE 454,THR 455,LYS 485,CYS 487,GLN 488,GLY 489,GLY 495,ASP 496,ASN 497,LYS 498,LEU 499,LEU 500,GLY 501,ILE 589                 | 80% | 21%  |
| COPA protein                                           | 245 | VAL 221,ARG 227,GLN 228,VAL 229,LYS 230,ILE 231,ASP 243,THR 244,CYS 245,ARG 246,GLY 247,SER 266, ARG 274,VAL 275,TRP 276,ASP 277,MET 278,ARG 281, VAL 284       | 57% | 34%  |
| Annexin-2                                              | 133 | GLU 125,ASP 126,SER 127,ILE 132,CYS 133,SER 134,ARG 135,PHE 167,LEU 174,ASP 251,ASN 254,LEU 257,ASN 258,LEU 259,CYS 262,TYR 269                                 | 63% | 34%  |
| Annexin-11                                             | 294 | PHE 276,ASP 277,ILE 278,TYR 279,GLU 280,LYS 282,GLU 283,ALA 284,ILE 285,THR 290,ASP 291,GLU 292,ALA 293,CYS 294,ILE 296,LEU 299,ARG 439,ARG 452,THR 453,ARG 456 | 53% | 25%  |
| Elongation factor alpha 1                              | 234 | GLN 147,LEU 148,ILE 149,THR 187,ALA 189,TRP 214,LYS 215,VAL 216,ARG 218,ALA 223,SER 224,GLY 225,THR 227,LEU 229,GLU 230,ASP 233,CYS 234,ILE 235,LEU 236         | 92% | 17%  |
| Protein Tyrosine Phosphatase                           | 215 | TYR 46,ASN 111,ASP 181,CYS 215,SER 216,ALA 217,ILE 219,GLY 220,ARG 221,GLN 262                                                                                  | 61% | 84%  |
| Syntaxin 1A                                            | 145 | GLN 138, ASP 140, TYR 141, ARG 142, GLU 143, ARG 144, LYS 146, GLY 147, ARG 148, THR 197, ARG 198, HIS 199, SER 200, GLU 201, ILE 202, ILE 203, LEU 205         | 60% | 27%  |
| Myeloid differentiation primary response protein MyD88 | 216 | ARG 160,PHE 161,ASP 162,PHE 164,LYS 190,LEU 191,TRP 205,ILE 207,ALA 208,LEU 211,ILE 212,GLU 213,LYS 214,ARG 215,CYS 216,ARG 217,ARG 218,PHE 239,ARG 251         | 55% | 30%  |
| Hemoglobin subunit beta                                | 293 | ALA 286,LEU 288,GLU 290,LEU 291,HIS 292,CYS 293,ASP 294,LYS 295,LEU 296,HIS 297,VAL 298,ASP 299,PRO 300,ALA 340,LEU 341,ALA 342,HIS 343,LYS 344,TYR 345         | 76% | 100% |
| Tubulin beta                                           | 12  | GLY 10,GLN 11,CYS 12,GLN 15,ILE 16,SER 140,GLY 142,VAL 171,ASN 206,TYR 224,ASN 228,VAL 231                                                                      | 99% | 99%  |

|                                            |     |                                                                                                                                         |      |      |
|--------------------------------------------|-----|-----------------------------------------------------------------------------------------------------------------------------------------|------|------|
| Tubulin beta                               | 241 | ALA 208,MET 301,ALA 303,ALA 304,CYS 305,ASP 306,PRO 307,GLN 385,GLU 386,ARG 390                                                         | 99%  | 88%  |
| Tubulin beta                               | 305 | ALA 208,MET 301,ALA 303,ALA 304,CYS 305,ASP 306,PRO 307,GLN 385,GLU 386,ARG 390                                                         | 97%  | 65%  |
| Tubulin beta                               | 356 | LEU 42,CYS 241,PHE 244,PRO 245,GLY 246,GLN 247,VAL 318,ARG 320,GLY 321,ALA 354,VAL 355,CYS 356,ASP 357,ILE 358,PRO 359                  | 99%  | 100% |
| Histone deacetylase 2                      | 262 | TRP 136,ILE 174,ASP 177,PHE 242,HIS 282, ALA 283,CYS 285,VAL 286,VAL 289,LEU 296,MET 298,GLY 301,TRP 313,GLU 316                        | 82%  | 83%  |
| Histone deacetylase 2                      | 274 | ILE 178,HIS 179,LYS 201,TYR 205,PHE 206,ARG 230,ASP 231,GLY 232,ASP 265,SER 266,ASP 270,ARG 271,LEU 272,GLY 273,CYS 274,PHE 275,MET 351 | 91%  | 94%  |
| Parkinson disease protein 7 (DJ1)          | 46  | ALA 11,LYS 12,GLY 13,GLU 15,GLU 16,MET 17,THR 19,VAL 20,PRO 43,VAL 44,GLN 45,CYS 46,SER 47,ARG 48,ASP 49,VAL 50,VAL 51,ILE 52,CYS 53    | 44%  | 28%  |
| Parkinson disease protein 7 (DJ1)          | 53  | LYS 41,ASP 42,PRO 43,VAL 44,VAL 51,ILE 52,CYS 53,PRO 54,ASP 55                                                                          | 20%  | 50%  |
| Dynamin-2                                  | 607 | LEU 526,THR 527,HIS 584,CYS 607,ASP 608,SER 609,GLN 610,GLU 611,ASP 612,VAL 613,ASP 614,SER 615,TRP 616,LYS 617                         | 100% | 100% |
| SG15 ubiquitin-like modifier               | 76  | PHE 41,GLN 42,ARG 44,VAL 73,GLN 74,ASN 75,CYS 76,SER 77,GLU 78,LEU 98                                                                   | 55%  | 1%   |
| G-protein coupled receptor kinase 2 (GRK2) | 340 | ASN 238,MET 242,PHE 312,ARG 316,LEU 338,CYS 340,ASP 341,PHE 342,SER 343,LYS 345,LYS 346,PRO 347,HIS 348,VAL 351,TYR 368                 | 78%  | 53%  |
| Dynamin-related protein 1                  | 644 | LEU 460,HIS 461,ASP 462,ALA 463,ILE 464,GLN 641,ARG 642,ASP 643,CYS 644,GLU 645,VAL 646,ILE 647,GLU 648                                 | 100% | 100% |
